# Supplementary material for: BioCore Guide: A Tool for Interpreting the Core Concepts of Vision and Change for Biology Majors
Source: PubMed Central journal article supplement — CBE Life Sci Educ. 2014 Summer;13(2):200–11. doi: 10.1187/cbe.13-12-0233 (PMC4041499; doi:10.1187/cbe.13-12-0233), 2014
Supplement: supp_13.2.200_CombinedSupMats1.pdf [file supp_13.2.200_CombinedSupMats1.pdf]

# Supplemental Material

*CBE—Life Sciences Education*

Brownell *et al.*

| Major Sub-disciplines of Biology           |                                                                                                                                                                                                                                                                                                                                                                                                                                                                                                                                                 |                                                                                                                                                                                 |                                                                                                                                        |                                                                                                                                                                                                                                                              |                                                                                                                                                                                                                                                                                                       |                                            |
|--------------------------------------------|-------------------------------------------------------------------------------------------------------------------------------------------------------------------------------------------------------------------------------------------------------------------------------------------------------------------------------------------------------------------------------------------------------------------------------------------------------------------------------------------------------------------------------------------------|---------------------------------------------------------------------------------------------------------------------------------------------------------------------------------|----------------------------------------------------------------------------------------------------------------------------------------|--------------------------------------------------------------------------------------------------------------------------------------------------------------------------------------------------------------------------------------------------------------|-------------------------------------------------------------------------------------------------------------------------------------------------------------------------------------------------------------------------------------------------------------------------------------------------------|--------------------------------------------|
| Molecular/ Cellular/ Developmental Biology |                                                                                                                                                                                                                                                                                                                                                                                                                                                                                                                                                 | Physiology                                                                                                                                                                      |                                                                                                                                        | Ecology/ Evolutionary Biology                                                                                                                                                                                                                                |                                                                                                                                                                                                                                                                                                       |                                            |
| <b>EVOLUTION</b>                           | <b>Overarching Principles:</b><br><i>Evolution is a change in allele frequencies caused by mutations, natural selection, gene flow, or genetic drift. Populations can diverge, leading to the formation of new species.</i><br><i>Mutations are changes in DNA that occur at random in every generation in every population. Natural selection occurs when individuals with certain heritable traits have higher reproductive success than individuals without those traits. Genetic drift occurs when allele frequencies change by chance.</i> |                                                                                                                                                                                 |                                                                                                                                        |                                                                                                                                                                                                                                                              |                                                                                                                                                                                                                                                                                                       |                                            |
|                                            | Importance for graduating biology major                                                                                                                                                                                                                                                                                                                                                                                                                                                                                                         |                                                                                                                                                                                 |                                                                                                                                        | Scientific accuracy                                                                                                                                                                                                                                          |                                                                                                                                                                                                                                                                                                       |                                            |
|                                            | 3.82 (0.04)                                                                                                                                                                                                                                                                                                                                                                                                                                                                                                                                     |                                                                                                                                                                                 |                                                                                                                                        | 3.55 (0.05)                                                                                                                                                                                                                                                  |                                                                                                                                                                                                                                                                                                       |                                            |
|                                            | SA: 85.9%<br>A: 12.5%<br>D: 0%<br>SD: 1.6%                                                                                                                                                                                                                                                                                                                                                                                                                                                                                                      |                                                                                                                                                                                 |                                                                                                                                        | SA: 60.9%<br>A: 35.3%<br>D: 2.2%<br>SD: 1.6%                                                                                                                                                                                                                 |                                                                                                                                                                                                                                                                                                       |                                            |
|                                            | <i>Multiple molecular mechanisms, including DNA damage and errors in replication, lead to the generation of random mutations. These mutations create new alleles that can be inherited via mitosis (through asexual reproduction) or meiosis (through sexual reproduction).</i>                                                                                                                                                                                                                                                                 |                                                                                                                                                                                 | Mutations that change protein structure and/or regulation can impact anatomy and physiological function at all levels of organization. |                                                                                                                                                                                                                                                              | The characteristics of populations change over time due to changes in allele frequencies. Changes in allele frequencies are caused by random and nonrandom processes--specifically mutation, natural selection, gene flow, and genetic drift. Not all of these changes are adaptive.                  |                                            |
|                                            | Importance for graduating biology major                                                                                                                                                                                                                                                                                                                                                                                                                                                                                                         | Scientific accuracy                                                                                                                                                             | Importance for graduating biology major                                                                                                | Scientific accuracy                                                                                                                                                                                                                                          | Importance for graduating biology major                                                                                                                                                                                                                                                               | Scientific accuracy                        |
|                                            | 3.79 (0.04)                                                                                                                                                                                                                                                                                                                                                                                                                                                                                                                                     | 3.58 (0.05)                                                                                                                                                                     | 3.73 (0.04)                                                                                                                            | 3.65 (0.04)                                                                                                                                                                                                                                                  | 3.81 (0.03)                                                                                                                                                                                                                                                                                           | 3.72 (0.04)                                |
|                                            | SA: 81.5%<br>A: 16.9%<br>D: 0.5%<br>SD: 1.1%                                                                                                                                                                                                                                                                                                                                                                                                                                                                                                    | SA: 64.1%<br>A: 31.5%<br>D: 2.7%<br>SD: 1.6%                                                                                                                                    | SA: 75%<br>A: 22.8%<br>D: 2.2%<br>SD: 0%                                                                                               | SA: 70.1%<br>A: 25.5%<br>D: 3.8%<br>SD: 0.5%                                                                                                                                                                                                                 | SA: 81.0%<br>A: 19.0%<br>D: 0%<br>SD: 0%                                                                                                                                                                                                                                                              | SA: 73.4%<br>A: 25.0%<br>D: 1.6%<br>SD: 0% |
|                                            | Mutations and epigenetic modifications can impact the regulation of gene expression and/or the structure and function of the gene product. If mutations affect phenotype and lead to increased reproductive success, the frequency of those alleles will increase in the population.                                                                                                                                                                                                                                                            |                                                                                                                                                                                 | <i>Most organisms have anatomical and physiological traits that maximize their fitness for a particular environment.</i>               |                                                                                                                                                                                                                                                              | All species alive today are derived from the same common ancestor. New species arise when populations become genetically isolated and diverge due to mutation, selection, and drift. Phylogenetic trees depict relationships among ancestral and descendant species, and are estimated based on data. |                                            |
|                                            | Importance for graduating biology major                                                                                                                                                                                                                                                                                                                                                                                                                                                                                                         | Scientific accuracy                                                                                                                                                             | Importance for graduating biology major                                                                                                | Scientific accuracy                                                                                                                                                                                                                                          | Importance for graduating biology major                                                                                                                                                                                                                                                               | Scientific accuracy                        |
| 3.77 (0.03)                                | 3.60 (0.04)                                                                                                                                                                                                                                                                                                                                                                                                                                                                                                                                     | 3.50 (0.05)                                                                                                                                                                     | 3.27 (0.06)                                                                                                                            | 3.73 (0.04)                                                                                                                                                                                                                                                  | 3.55 (0.05)                                                                                                                                                                                                                                                                                           |                                            |
| SA: 78.3%<br>A: 20.7%<br>D: 1.1%<br>SD: 0% | SA: 63.6%<br>A: 33.1%<br>D: 3.26%<br>SD: 0%                                                                                                                                                                                                                                                                                                                                                                                                                                                                                                     | SA: 60.3%<br>A: 31.0%<br>D: 7.6%<br>SD: 1.1%                                                                                                                                    | SA: 46.7%<br>A: 35.9%<br>D: 15.2%<br>SD: 2.2%                                                                                          | SA: 77.2%<br>A: 19.6%<br>D: 2.2%<br>SD: 1.1%                                                                                                                                                                                                                 | SA: 63.0%<br>A: 30.4%<br>D: 4.9%<br>SD: 1.6%                                                                                                                                                                                                                                                          |                                            |
|                                            |                                                                                                                                                                                                                                                                                                                                                                                                                                                                                                                                                 | Physiological systems are constrained by ancestral structures, physical limits, and the requirements of other physiological systems, leading to trade-offs that affect fitness. |                                                                                                                                        | Fitness is an individual's ability to survive and reproduce. It is environment-specific and depends on both abiotic and biotic factors. Natural selection's ability to optimize fitness is constrained by trade-offs, existing variation, and other factors. |                                                                                                                                                                                                                                                                                                       |                                            |
|                                            |                                                                                                                                                                                                                                                                                                                                                                                                                                                                                                                                                 | Importance for graduating biology major                                                                                                                                         | Scientific accuracy                                                                                                                    | Importance for graduating biology major                                                                                                                                                                                                                      | Scientific accuracy                                                                                                                                                                                                                                                                                   |                                            |
|                                            |                                                                                                                                                                                                                                                                                                                                                                                                                                                                                                                                                 | 3.61 (0.04)                                                                                                                                                                     | 3.60 (0.05)                                                                                                                            | 3.68 (0.04)                                                                                                                                                                                                                                                  | 3.57 (0.05)                                                                                                                                                                                                                                                                                           |                                            |
|                                            |                                                                                                                                                                                                                                                                                                                                                                                                                                                                                                                                                 | SA: 66.8%<br>A: 28.3%<br>D: 4.4%<br>SD: 0.5%                                                                                                                                    | SA: 66.3%<br>A: 28.3%<br>D: 4.9%<br>SD: 0.5%                                                                                           | SA: 73.9%<br>A: 21.7%<br>D: 3.3%<br>SD: 1.1%                                                                                                                                                                                                                 | SA: 65.2%<br>A: 28.8%<br>D: 3.8%<br>SD: 2.2%                                                                                                                                                                                                                                                          |                                            |
| <b>Molecules<br/>(Smaller and faster)</b>  |                                                                                                                                                                                                                                                                                                                                                                                                                                                                                                                                                 | ▶                                                                                                                                                                               |                                                                                                                                        | <b>Ecosystems<br/>(Larger and slower)</b>                                                                                                                                                                                                                    |                                                                                                                                                                                                                                                                                                       |                                            |
| <b>Biological Scale</b>                    |                                                                                                                                                                                                                                                                                                                                                                                                                                                                                                                                                 |                                                                                                                                                                                 |                                                                                                                                        |                                                                                                                                                                                                                                                              |                                                                                                                                                                                                                                                                                                       |                                            |

| Major Sub-disciplines of Biology                                                                                                                                                        |                                                                                                                                                                                                                                                                                                                                                                                                                                                                       |                                              |                                                                                                                                                                                                                                              |                                                                 |                                                                                                                                                              |                                            |
|-----------------------------------------------------------------------------------------------------------------------------------------------------------------------------------------|-----------------------------------------------------------------------------------------------------------------------------------------------------------------------------------------------------------------------------------------------------------------------------------------------------------------------------------------------------------------------------------------------------------------------------------------------------------------------|----------------------------------------------|----------------------------------------------------------------------------------------------------------------------------------------------------------------------------------------------------------------------------------------------|-----------------------------------------------------------------|--------------------------------------------------------------------------------------------------------------------------------------------------------------|--------------------------------------------|
| Molecular/ Cellular/ Developmental Biology                                                                                                                                              |                                                                                                                                                                                                                                                                                                                                                                                                                                                                       | Physiology                                   |                                                                                                                                                                                                                                              | Ecology/ Evolutionary Biology                                   |                                                                                                                                                              |                                            |
| <b>INFORMATION FLOW</b>                                                                                                                                                                 | <p align="center"><b>Overarching Principles:</b><br/> <i>Organisms inherit genetic and epigenetic information that contribute to an individual's phenotype. The timing and degree of gene expression is highly regulated, in a way that affects phenotype.</i><br/> <i>Cells/organs/organisms constantly monitor their internal and external environment. Perception and transmission of this information allows organisms to respond to changing conditions.</i></p> |                                              |                                                                                                                                                                                                                                              |                                                                 |                                                                                                                                                              |                                            |
|                                                                                                                                                                                         | Importance for graduating biology major                                                                                                                                                                                                                                                                                                                                                                                                                               |                                              |                                                                                                                                                                                                                                              | Scientific accuracy                                             |                                                                                                                                                              |                                            |
|                                                                                                                                                                                         | 3.74 (0.03)                                                                                                                                                                                                                                                                                                                                                                                                                                                           |                                              |                                                                                                                                                                                                                                              | 3.58 (0.04)                                                     |                                                                                                                                                              |                                            |
|                                                                                                                                                                                         | SA: 75.0%<br>A: 23.9%<br>D: 1.1%<br>SD: 0%                                                                                                                                                                                                                                                                                                                                                                                                                            |                                              |                                                                                                                                                                                                                                              | SA: 61.4%<br>A: 35.3%<br>D: 3.3%<br>SD: 0%                      |                                                                                                                                                              |                                            |
|                                                                                                                                                                                         | In most cases, genetic information flows from DNA to mRNA to protein, but there are important exceptions.                                                                                                                                                                                                                                                                                                                                                             |                                              | Information stored in DNA is expressed as RNA and/or proteins that impact anatomical structures and physiological function.                                                                                                                  |                                                                 | Individuals transmit genetic information to their offspring; some alleles confer higher fitness than others.                                                 |                                            |
|                                                                                                                                                                                         | Importance for graduating biology major                                                                                                                                                                                                                                                                                                                                                                                                                               | Scientific accuracy                          | Importance for graduating biology major                                                                                                                                                                                                      | Scientific accuracy                                             | Importance for graduating biology major                                                                                                                      | Scientific accuracy                        |
|                                                                                                                                                                                         | 3.66 (0.04)                                                                                                                                                                                                                                                                                                                                                                                                                                                           | 3.59 (0.04)                                  | 3.73 (0.04)                                                                                                                                                                                                                                  | 3.65 (0.04)                                                     | 3.71 (0.04)                                                                                                                                                  | 3.64 (0.04)                                |
|                                                                                                                                                                                         | SA: 69.0%<br>A: 28.8%<br>D: 1.6%<br>SD: 0.5%                                                                                                                                                                                                                                                                                                                                                                                                                          | SA: 62.5%<br>A: 34.8%<br>D: 2.2%<br>SD: 0.5% | SA: 76.6%<br>A: 20.1%<br>D: 2.7%<br>SD: 0.5%                                                                                                                                                                                                 | SA: 69.0%<br>A: 27.7%<br>D: 2.7%<br>SD: 0.5%                    | SA: 72.3%<br>A: 26.1%<br>D: 1.6%<br>SD: 0%                                                                                                                   | SA: 65.8%<br>A: 32.1%<br>D: 2.2%<br>SD: 0% |
|                                                                                                                                                                                         | Gene expression and protein activity are regulated by intracellular and extracellular signaling molecules. Signal transduction pathways are crucial in relaying these signals.                                                                                                                                                                                                                                                                                        |                                              | Organisms have sophisticated mechanisms for sensing changes in the internal or external environment. They use chemical, electrical, or other forms of signaling to coordinate responses at the cellular, tissue, organ, and/or system level. |                                                                 | A genotype influences the range of possible phenotypes in an individual; the actual phenotype results from interactions between alleles and the environment. |                                            |
|                                                                                                                                                                                         | Importance for graduating biology major                                                                                                                                                                                                                                                                                                                                                                                                                               | Scientific accuracy                          | Importance for graduating biology major                                                                                                                                                                                                      | Scientific accuracy                                             | Importance for graduating biology major                                                                                                                      | Scientific accuracy                        |
| 3.62 (0.04)                                                                                                                                                                             | 3.69 (0.03)                                                                                                                                                                                                                                                                                                                                                                                                                                                           | 3.70 (0.04)                                  | 3.72 (0.03)                                                                                                                                                                                                                                  | 3.79 (0.03)                                                     | 3.70 (0.04)                                                                                                                                                  |                                            |
| SA: 66.3%<br>A: 29.4%<br>D: 4.4%<br>SD: 0%                                                                                                                                              | SA: 69.0%<br>A: 31.0%<br>D: 0%<br>SD: 0%                                                                                                                                                                                                                                                                                                                                                                                                                              | SA: 71.2%<br>A: 27.2%<br>D: 1.6%<br>SD: 0%   | SA: 72.3%<br>A: 27.7%<br>D: 0%<br>SD: 0%                                                                                                                                                                                                     | SA: 79.9%<br>A: 19.0%<br>D: 1.1%<br>SD: 0%                      | SA: 71.7%<br>A: 26.1%<br>D: 2.2%<br>SD: 0%                                                                                                                   |                                            |
| The signals that a cell receives depend on its location, and change through time. As a result, different types of cells express different genes, even though they contain the same DNA. |                                                                                                                                                                                                                                                                                                                                                                                                                                                                       |                                              |                                                                                                                                                                                                                                              |                                                                 |                                                                                                                                                              |                                            |
| Importance for graduating biology major                                                                                                                                                 | Scientific accuracy                                                                                                                                                                                                                                                                                                                                                                                                                                                   |                                              |                                                                                                                                                                                                                                              |                                                                 |                                                                                                                                                              |                                            |
| 3.77 (0.03)                                                                                                                                                                             | 3.64 (0.04)                                                                                                                                                                                                                                                                                                                                                                                                                                                           |                                              |                                                                                                                                                                                                                                              |                                                                 |                                                                                                                                                              |                                            |
| SA: 78.3%<br>A: 20.6%<br>D: 1.1%<br>SD: 0%                                                                                                                                              |                                                                                                                                                                                                                                                                                                                                                                                                                                                                       | SA: 66.3%<br>A: 31.5%<br>D: 2.2%<br>SD: 0%   |                                                                                                                                                                                                                                              |                                                                 |                                                                                                                                                              |                                            |
| <p align="center"><b>Molecules<br/>(Smaller and faster)</b></p>                                                                                                                         |                                                                                                                                                                                                                                                                                                                                                                                                                                                                       |                                              | ▶                                                                                                                                                                                                                                            | <p align="center"><b>Ecosystems<br/>(Larger and slower)</b></p> |                                                                                                                                                              |                                            |
| <b>Biological Scale</b>                                                                                                                                                                 |                                                                                                                                                                                                                                                                                                                                                                                                                                                                       |                                              |                                                                                                                                                                                                                                              |                                                                 |                                                                                                                                                              |                                            |

| Major Sub-disciplines of Biology                                                                                 |                                                                                                                                                                                                                                                                                                                                                                                                                              |                                                                                                                                        |                                                                                                                                                                                                                                 |                                              |                                                                                                                                   |                                              |
|------------------------------------------------------------------------------------------------------------------|------------------------------------------------------------------------------------------------------------------------------------------------------------------------------------------------------------------------------------------------------------------------------------------------------------------------------------------------------------------------------------------------------------------------------|----------------------------------------------------------------------------------------------------------------------------------------|---------------------------------------------------------------------------------------------------------------------------------------------------------------------------------------------------------------------------------|----------------------------------------------|-----------------------------------------------------------------------------------------------------------------------------------|----------------------------------------------|
| Molecular/ Cellular/ Developmental Biology                                                                       |                                                                                                                                                                                                                                                                                                                                                                                                                              | Physiology                                                                                                                             |                                                                                                                                                                                                                                 | Ecology/ Evolutionary Biology                |                                                                                                                                   |                                              |
| <b>STRUCTURE FUNCTION</b>                                                                                        | <b>Overarching Principles:</b><br><i>Biological structures can be studied at all levels of organization, from molecules to ecosystems.</i><br><br><i>Natural selection favors the evolution of structures that maximize fitness within the context of evolutionary and environmental constraints.</i><br><br><i>A structure's function is a product of its physical characteristics (e.g size and chemical composition).</i> |                                                                                                                                        |                                                                                                                                                                                                                                 |                                              |                                                                                                                                   |                                              |
|                                                                                                                  | Importance for graduating biology major                                                                                                                                                                                                                                                                                                                                                                                      |                                                                                                                                        |                                                                                                                                                                                                                                 | Scientific accuracy                          |                                                                                                                                   |                                              |
|                                                                                                                  | 3.71 (0.04)                                                                                                                                                                                                                                                                                                                                                                                                                  |                                                                                                                                        |                                                                                                                                                                                                                                 | 3.45 (0.05)                                  |                                                                                                                                   |                                              |
|                                                                                                                  | SA: 73.9%<br>A: 22.8%<br>D: 3.3%<br>SD: 0%                                                                                                                                                                                                                                                                                                                                                                                   |                                                                                                                                        |                                                                                                                                                                                                                                 | SA: 54.4%<br>A: 37.0%<br>D: 8.1%<br>SD: 0.5% |                                                                                                                                   |                                              |
|                                                                                                                  | The structure of a cell--its shape, organelles, and polarity--impacts its function.                                                                                                                                                                                                                                                                                                                                          |                                                                                                                                        | Physiological functions are often compartmentalized into different cells, tissues, organs, and systems, which have structures that support specialized activities.                                                              |                                              | Natural selection has favored structures whose shape and composition contribute to their ecological function.                     |                                              |
|                                                                                                                  | Importance for graduating biology major                                                                                                                                                                                                                                                                                                                                                                                      | Scientific accuracy                                                                                                                    | Importance for graduating biology major                                                                                                                                                                                         | Scientific accuracy                          | Importance for graduating biology major                                                                                           | Scientific accuracy                          |
|                                                                                                                  | 3.70 (0.04)                                                                                                                                                                                                                                                                                                                                                                                                                  | 3.64 (0.04)                                                                                                                            | 3.63 (0.04)                                                                                                                                                                                                                     | 3.64 (0.04)                                  | 3.47 (0.05)                                                                                                                       | 3.38 (0.05)                                  |
|                                                                                                                  | SA: 71.7%<br>A: 26.1%<br>D: 2.2%<br>SD: 0%                                                                                                                                                                                                                                                                                                                                                                                   | SA: 67.4%<br>A: 29.3%<br>D: 3.3%<br>SD: 0%                                                                                             | SA: 67.9%<br>A: 27.2%<br>D: 4.4%<br>SD: 0.5%                                                                                                                                                                                    | SA: 66.3%<br>A: 31.5%<br>D: 1.6%<br>SD: 0.5% | SA: 56.5%<br>A: 35.3%<br>D: 7.1%<br>SD: 1.1%                                                                                      | SA: 48.9%<br>A: 41.3%<br>D: 8.7%<br>SD: 1.1% |
|                                                                                                                  | The three dimensional structure of a molecule and its subcellular localization impact its function, including the ability to catalyze reactions or interact with other molecules.                                                                                                                                                                                                                                            |                                                                                                                                        | The size, shape, and physical properties of organs and organisms all affect function. The ratio of surface area to volume is particularly critical for structures that function in transport or exchange of materials and heat. |                                              | Competition, mutualism, and other interactions are mediated by each species' morphological, physiological, and behavioral traits. |                                              |
|                                                                                                                  | Importance for graduating biology major                                                                                                                                                                                                                                                                                                                                                                                      | Scientific accuracy                                                                                                                    | Importance for graduating biology major                                                                                                                                                                                         | Scientific accuracy                          | Importance for graduating biology major                                                                                           | Scientific accuracy                          |
| 3.70 (0.04)                                                                                                      | 3.68 (0.04)                                                                                                                                                                                                                                                                                                                                                                                                                  | 3.59 (0.04)                                                                                                                            | 3.64 (0.04)                                                                                                                                                                                                                     | 3.61 (0.04)                                  | 3.60 (0.04)                                                                                                                       |                                              |
| SA: 72.8%<br>A: 22.8%<br>D: 3.8%<br>SD: 0.5%                                                                     | SA: 71.2%<br>A: 26.6%<br>D: 1.6%<br>SD: 0.5%                                                                                                                                                                                                                                                                                                                                                                                 | SA: 65.2%<br>A: 28.8%<br>D: 6.0%<br>SD: 0%                                                                                             | SA: 65.8%<br>A: 32.1%<br>D: 2.2%<br>SD: 0%                                                                                                                                                                                      | SA: 65.2%<br>A: 31.0%<br>D: 3.8%<br>SD: 0%   | SA: 60.9%<br>A: 38.0%<br>D: 1.1%<br>SD: 0%                                                                                        |                                              |
| The structure of molecules or organisms may be similar due to common ancestry or selection for similar function. |                                                                                                                                                                                                                                                                                                                                                                                                                              | Structure constrains function in physiology; specialization for one function limits a structure's ability to perform another function. |                                                                                                                                                                                                                                 |                                              |                                                                                                                                   |                                              |
| Importance for graduating biology major                                                                          | Scientific accuracy                                                                                                                                                                                                                                                                                                                                                                                                          | Importance for graduating biology major                                                                                                | Scientific accuracy                                                                                                                                                                                                             |                                              |                                                                                                                                   |                                              |
| 3.64 (0.05)                                                                                                      | 3.64 (0.04)                                                                                                                                                                                                                                                                                                                                                                                                                  | 3.47 (0.05)                                                                                                                            | 3.50 (0.05)                                                                                                                                                                                                                     |                                              |                                                                                                                                   |                                              |
| SA: 70.1%<br>A: 23.9%<br>D: 5.4%<br>SD: 0.5%                                                                     | SA: 67.4%<br>A: 29.9%<br>D: 2.2%<br>SD: 0.5%                                                                                                                                                                                                                                                                                                                                                                                 | SA: 56.0%<br>A: 35.3%<br>D: 8.2%<br>SD: 0.5%                                                                                           | SA: 56.5%<br>A: 37.0%<br>D: 5.4%<br>SD: 1.1%                                                                                                                                                                                    |                                              |                                                                                                                                   |                                              |
| <b>Molecules<br/>(Smaller and faster)</b>                                                                        |                                                                                                                                                                                                                                                                                                                                                                                                                              |                                                                                                                                        | ▶                                                                                                                                                                                                                               | <b>Ecosystems<br/>(Larger and slower)</b>    |                                                                                                                                   |                                              |
| <b>Biological Scale</b>                                                                                          |                                                                                                                                                                                                                                                                                                                                                                                                                              |                                                                                                                                        |                                                                                                                                                                                                                                 |                                              |                                                                                                                                   |                                              |

| Major Sub-disciplines of Biology                                                                                                                                                                                                    |                                                                                                                                                                                                                                                                                                                                |                                                                                                                                                                                                                                                      |                                                                                                                                                                                                                                                                 |                                              |                                                                                                                                                                                                                                                                                                                                             |                                              |
|-------------------------------------------------------------------------------------------------------------------------------------------------------------------------------------------------------------------------------------|--------------------------------------------------------------------------------------------------------------------------------------------------------------------------------------------------------------------------------------------------------------------------------------------------------------------------------|------------------------------------------------------------------------------------------------------------------------------------------------------------------------------------------------------------------------------------------------------|-----------------------------------------------------------------------------------------------------------------------------------------------------------------------------------------------------------------------------------------------------------------|----------------------------------------------|---------------------------------------------------------------------------------------------------------------------------------------------------------------------------------------------------------------------------------------------------------------------------------------------------------------------------------------------|----------------------------------------------|
| Molecular/ Cellular/ Developmental Biology                                                                                                                                                                                          |                                                                                                                                                                                                                                                                                                                                | Physiology                                                                                                                                                                                                                                           |                                                                                                                                                                                                                                                                 | Ecology/ Evolutionary Biology                |                                                                                                                                                                                                                                                                                                                                             |                                              |
| <b>TRANSFORMATIONS OF ENERGY AND MATTER</b>                                                                                                                                                                                         | <b>Overarching Principles:</b><br><i>Life takes work – it can only be sustained with inputs of energy.</i><br><br><i>Natural selection has favored the evolution of regulatory systems that allow individuals to use limited resources efficiently.</i>                                                                        |                                                                                                                                                                                                                                                      |                                                                                                                                                                                                                                                                 |                                              |                                                                                                                                                                                                                                                                                                                                             |                                              |
|                                                                                                                                                                                                                                     | Importance for graduating biology major                                                                                                                                                                                                                                                                                        |                                                                                                                                                                                                                                                      |                                                                                                                                                                                                                                                                 | Scientific accuracy                          |                                                                                                                                                                                                                                                                                                                                             |                                              |
|                                                                                                                                                                                                                                     | 3.70 (0.04)                                                                                                                                                                                                                                                                                                                    |                                                                                                                                                                                                                                                      |                                                                                                                                                                                                                                                                 | 3.43 (0.05)                                  |                                                                                                                                                                                                                                                                                                                                             |                                              |
|                                                                                                                                                                                                                                     | SA: 73.4%<br>A: 21.7%<br>D: 4.3%<br>SD: 0.5%                                                                                                                                                                                                                                                                                   |                                                                                                                                                                                                                                                      |                                                                                                                                                                                                                                                                 | SA: 56.0%<br>A: 33.1%<br>D: 9.2%<br>SD: 1.6% |                                                                                                                                                                                                                                                                                                                                             |                                              |
|                                                                                                                                                                                                                                     | <i>Energy captured by primary producers is stored as chemical energy and used to drive production of ATP via cellular respiration and other processes.</i>                                                                                                                                                                     |                                                                                                                                                                                                                                                      | <i>Energy captured by primary producers is stored as chemical energy. Organisms use chemical energy to drive the production of ATP. ATP is required for energetically demanding activities necessary for life, including movement, transport and synthesis.</i> |                                              | <i>Primary producers convert solar and other types of energy into chemical energy. At each trophic level, most of this energy is used for maintenance, with a relatively small fraction available for growth and reproduction. As a consequence, each trophic level in an ecosystem has less energy available than the preceding level.</i> |                                              |
|                                                                                                                                                                                                                                     | Importance for graduating biology major                                                                                                                                                                                                                                                                                        | Scientific accuracy                                                                                                                                                                                                                                  | Importance for graduating biology major                                                                                                                                                                                                                         | Scientific accuracy                          | Importance for graduating biology major                                                                                                                                                                                                                                                                                                     | Scientific accuracy                          |
|                                                                                                                                                                                                                                     | 3.80 (0.03)                                                                                                                                                                                                                                                                                                                    | 3.66 (0.04)                                                                                                                                                                                                                                          | 3.77 (0.03)                                                                                                                                                                                                                                                     | 3.67 (0.04)                                  | 3.65 (0.05)                                                                                                                                                                                                                                                                                                                                 | 3.58 (0.04)                                  |
|                                                                                                                                                                                                                                     | SA: 81%<br>A: 17.9%<br>D: 1.1%<br>SD: 0%                                                                                                                                                                                                                                                                                       | SA: 66.9%<br>A: 32.1%<br>D: 1.1%<br>SD: 0%                                                                                                                                                                                                           | SA: 78.8%<br>A: 19.6%<br>D: 1.6%<br>SD: 0%                                                                                                                                                                                                                      | SA: 70.7%<br>A: 26.1%<br>D: 3.3%<br>SD: 0%   | SA: 71.2%<br>A: 22.8%<br>D: 5.4%<br>SD: 0.5%                                                                                                                                                                                                                                                                                                | SA: 62.5%<br>A: 33.7%<br>D: 3.3%<br>SD: 0.5% |
|                                                                                                                                                                                                                                     | <i>In cells, the synthesis and breakdown of molecules is highly regulated. Biochemical pathways usually involve multiple reactions, each catalyzed by an enzyme that lowers the activation energy. Energetically unfavorable reactions are driven by coupling to energetically favorable reactions such as ATP hydrolysis.</i> |                                                                                                                                                                                                                                                      | Due to the inefficiency of biochemical reactions and other constraints, physiological processes are never 100% efficient.                                                                                                                                       |                                              | Chemical elements are transferred among the abiotic and biotic components of an ecosystem; changes in the amount and distribution of chemical elements can impact the ecosystem.                                                                                                                                                            |                                              |
|                                                                                                                                                                                                                                     | Importance for graduating biology major                                                                                                                                                                                                                                                                                        | Scientific accuracy                                                                                                                                                                                                                                  | Importance for graduating biology major                                                                                                                                                                                                                         | Scientific accuracy                          | Importance for graduating biology major                                                                                                                                                                                                                                                                                                     | Scientific accuracy                          |
| 3.70 (0.04)                                                                                                                                                                                                                         | 3.69 (0.03)                                                                                                                                                                                                                                                                                                                    | 3.60 (0.05)                                                                                                                                                                                                                                          | 3.62 (0.04)                                                                                                                                                                                                                                                     | 3.64 (0.04)                                  | 3.69 (0.04)                                                                                                                                                                                                                                                                                                                                 |                                              |
| SA: 73.9%<br>A: 21.7%<br>D: 4.3%<br>SD: 0%                                                                                                                                                                                          | SA: 69.6%<br>A: 29.9%<br>D: 0.5%<br>SD: 0%                                                                                                                                                                                                                                                                                     | SA: 66.8%<br>A: 26.1%<br>D: 7.1%<br>SD: 0%                                                                                                                                                                                                           | SA: 66.3%<br>A: 29.9%<br>D: 3.3%<br>SD: 0.5%                                                                                                                                                                                                                    | SA: 67.4%<br>A: 29.3%<br>D: 2.7%<br>SD: 0.5% | SA: 70.6%<br>A: 27.7%<br>D: 1.6%<br>SD: 0%                                                                                                                                                                                                                                                                                                  |                                              |
| <i>Molecules move within and between cells via 1) energy-demanding transport processes and 2) random motion. A molecules' movement is affected by its thermal energy, size, concentration gradient, and biochemical properties.</i> |                                                                                                                                                                                                                                                                                                                                | Organisms have limited energetic and material resources which must be distributed across competing functional demands. These include movement of material across gradients, growth, maintenance, and reproduction, inevitably leading to trade-offs. |                                                                                                                                                                                                                                                                 |                                              |                                                                                                                                                                                                                                                                                                                                             |                                              |
| Importance for graduating biology major                                                                                                                                                                                             | Scientific accuracy                                                                                                                                                                                                                                                                                                            | Importance for graduating biology major                                                                                                                                                                                                              | Scientific accuracy                                                                                                                                                                                                                                             |                                              |                                                                                                                                                                                                                                                                                                                                             |                                              |
| 3.58 (0.05)                                                                                                                                                                                                                         | 3.61 (0.04)                                                                                                                                                                                                                                                                                                                    | 3.56 (0.05)                                                                                                                                                                                                                                          | 3.66 (0.04)                                                                                                                                                                                                                                                     |                                              |                                                                                                                                                                                                                                                                                                                                             |                                              |
| SA: 65.2%<br>A: 28.3%<br>D: 6.0%<br>SD: 0.5%                                                                                                                                                                                        | SA: 63.0%<br>A: 34.8%<br>D: 2.2%<br>SD: 0%                                                                                                                                                                                                                                                                                     | SA: 65.8%<br>A: 25.5%<br>D: 8.2%<br>SD: 0.5%                                                                                                                                                                                                         | SA: 66.9%<br>A: 32.6%<br>D: 0.5%<br>SD: 0%                                                                                                                                                                                                                      |                                              |                                                                                                                                                                                                                                                                                                                                             |                                              |
| <b>Molecules<br/>(Smaller and faster)</b>                                                                                                                                                                                           |                                                                                                                                                                                                                                                                                                                                |                                                                                                                                                                                                                                                      | ▶                                                                                                                                                                                                                                                               | <b>Ecosystems<br/>(Larger and slower)</b>    |                                                                                                                                                                                                                                                                                                                                             |                                              |
| <b>Biological Scale</b>                                                                                                                                                                                                             |                                                                                                                                                                                                                                                                                                                                |                                                                                                                                                                                                                                                      |                                                                                                                                                                                                                                                                 |                                              |                                                                                                                                                                                                                                                                                                                                             |                                              |

| Major Sub-disciplines of Biology                                                                                                     |                                                                                                                                                                                                                                                                                                                        |                                                                                                                                                                                                                        |                                                                                                                                                |                                                                                                                                                              |                                                                                                                                                                                                                                                                                                                                              |                                            |
|--------------------------------------------------------------------------------------------------------------------------------------|------------------------------------------------------------------------------------------------------------------------------------------------------------------------------------------------------------------------------------------------------------------------------------------------------------------------|------------------------------------------------------------------------------------------------------------------------------------------------------------------------------------------------------------------------|------------------------------------------------------------------------------------------------------------------------------------------------|--------------------------------------------------------------------------------------------------------------------------------------------------------------|----------------------------------------------------------------------------------------------------------------------------------------------------------------------------------------------------------------------------------------------------------------------------------------------------------------------------------------------|--------------------------------------------|
| Molecular/ Cellular/ Developmental Biology                                                                                           |                                                                                                                                                                                                                                                                                                                        | Physiology                                                                                                                                                                                                             |                                                                                                                                                | Ecology/ Evolutionary Biology                                                                                                                                |                                                                                                                                                                                                                                                                                                                                              |                                            |
| <b>SYSTEMS</b>                                                                                                                       | <b>Overarching Principles:</b><br><i>Biological molecules, cells, tissues, organs, and individuals do not exist in isolation— they interact in a highly regulated way.</i><br><i>Organisms have evolved complex systems to integrate internal and external information and respond to their changing environments.</i> |                                                                                                                                                                                                                        |                                                                                                                                                |                                                                                                                                                              |                                                                                                                                                                                                                                                                                                                                              |                                            |
|                                                                                                                                      | Importance for graduating biology major                                                                                                                                                                                                                                                                                |                                                                                                                                                                                                                        |                                                                                                                                                | Scientific accuracy                                                                                                                                          |                                                                                                                                                                                                                                                                                                                                              |                                            |
|                                                                                                                                      | 3.77 (0.04)                                                                                                                                                                                                                                                                                                            |                                                                                                                                                                                                                        |                                                                                                                                                | 3.60 (0.05)                                                                                                                                                  |                                                                                                                                                                                                                                                                                                                                              |                                            |
|                                                                                                                                      | SA: 80.4%<br>A: 16.8%<br>D: 1.6%<br>SD: 1.1%                                                                                                                                                                                                                                                                           |                                                                                                                                                                                                                        |                                                                                                                                                | SA: 68.5%<br>A: 25.0%<br>D: 4.9%<br>SD: 1.6%                                                                                                                 |                                                                                                                                                                                                                                                                                                                                              |                                            |
|                                                                                                                                      | Cells receive a complex array of chemical and physical signals that vary in time, location, and intensity over the lifespan of the organism; a cell's response depends on integration and coordination of these various signals.                                                                                       |                                                                                                                                                                                                                        | Organ systems are not isolated, but interact with each other through chemical and physical signals at the level of cells, tissues, and organs. |                                                                                                                                                              | The size and structure of populations are dynamic. A species' abundance and distribution is limited by available resources and by interactions between biotic and abiotic factors.                                                                                                                                                           |                                            |
|                                                                                                                                      | Importance for graduating biology major                                                                                                                                                                                                                                                                                | Scientific accuracy                                                                                                                                                                                                    | Importance for graduating biology major                                                                                                        | Scientific accuracy                                                                                                                                          | Importance for graduating biology major                                                                                                                                                                                                                                                                                                      | Scientific accuracy                        |
|                                                                                                                                      | 3.50 (0.05)                                                                                                                                                                                                                                                                                                            | 3.65 (0.04)                                                                                                                                                                                                            | 3.72 (0.03)                                                                                                                                    | 3.75 (0.03)                                                                                                                                                  | 3.73 (0.03)                                                                                                                                                                                                                                                                                                                                  | 3.71 (0.03)                                |
|                                                                                                                                      | SA: 59.8%<br>A: 31.5%<br>D: 0.5%<br>SD: 0%                                                                                                                                                                                                                                                                             | SA: 66.3%<br>A: 32.6%<br>D: 1.1%<br>SD: 0%                                                                                                                                                                             | SA: 72.8%<br>A: 26.6%<br>D: 0.5%<br>SD: 0%                                                                                                     | SA: 75.5%<br>A: 23.9%<br>D: 0.5%<br>SD: 0%                                                                                                                   | SA: 74.5%<br>A: 24.4%<br>D: 1.1%<br>SD: 0%                                                                                                                                                                                                                                                                                                   | SA: 72.3%<br>A: 26.1%<br>D: 1.6%<br>SD: 0% |
|                                                                                                                                      | During development, the signals a cell receives depend on its spatial orientation within the embryo and its intercellular interactions. As a consequence, cells adopt different cell fates depending on their local environment.                                                                                       |                                                                                                                                                                                                                        | An individual's physiological traits affect its interactions with other organisms and with its physical environment.                           |                                                                                                                                                              | Ecosystems are not isolated and static—they respond to change, both as a result of intrinsic changes to networks of species and as a result of extrinsic environmental drivers. Within an ecosystem, interactions among individuals form networks; changes in one node of a network can cause changes in other nodes—directly or indirectly. |                                            |
|                                                                                                                                      | Importance for graduating biology major                                                                                                                                                                                                                                                                                | Scientific accuracy                                                                                                                                                                                                    | Importance for graduating biology major                                                                                                        | Scientific accuracy                                                                                                                                          | Importance for graduating biology major                                                                                                                                                                                                                                                                                                      | Scientific accuracy                        |
| 3.54 (0.05)                                                                                                                          | 3.67 (0.04)                                                                                                                                                                                                                                                                                                            | 3.52 (0.04)                                                                                                                                                                                                            | 3.60 (0.04)                                                                                                                                    | 3.68 (0.04)                                                                                                                                                  | 3.68 (0.04)                                                                                                                                                                                                                                                                                                                                  |                                            |
| SA: 60.3%<br>A: 33.2%<br>D: 6.5%<br>SD: 0%                                                                                           | SA: 67.0%<br>A: 31.5%<br>D: 0.5%<br>SD: 0%                                                                                                                                                                                                                                                                             | SA: 58.2%<br>A: 35.9%<br>D: 6.0%<br>SD: 0%                                                                                                                                                                             | SA: 62.5%<br>A: 34.8%<br>D: 2.7%<br>SD: 0%                                                                                                     | SA: 70.6%<br>A: 27.2%<br>D: 2.2%<br>SD: 0%                                                                                                                   | SA: 69.6%<br>A: 29.3%<br>D: 1.1%<br>SD: 0%                                                                                                                                                                                                                                                                                                   |                                            |
| Alteration of a single gene or molecule in a signaling network may have complex impacts at the cell, tissue or whole-organism level. |                                                                                                                                                                                                                                                                                                                        | In the face of environmental changes, organisms may maintain homeostasis through control mechanisms that often use negative feedback; others have adaptations that allow them to acclimate to environmental variation. |                                                                                                                                                | Biodiversity impacts many aspects of an ecosystem. In general, species-rich ecosystems function are more stable and productive than species-poor ecosystems. |                                                                                                                                                                                                                                                                                                                                              |                                            |
| Importance for graduating biology major                                                                                              | Scientific accuracy                                                                                                                                                                                                                                                                                                    | Importance for graduating biology major                                                                                                                                                                                | Scientific accuracy                                                                                                                            | Importance for graduating biology major                                                                                                                      | Scientific accuracy                                                                                                                                                                                                                                                                                                                          |                                            |
| 3.61 (0.04)                                                                                                                          | 3.68 (0.03)                                                                                                                                                                                                                                                                                                            | 3.60 (0.05)                                                                                                                                                                                                            | 3.54 (0.04)                                                                                                                                    | 3.48 (0.05)                                                                                                                                                  | 3.34 (0.05)                                                                                                                                                                                                                                                                                                                                  |                                            |
| SA: 65.2%<br>A: 30.4%<br>D: 4.4%<br>SD: 0%                                                                                           | SA: 68.5%<br>A: 31.5%<br>D: 0%<br>SD: 0%                                                                                                                                                                                                                                                                               | SA: 67.9%<br>A: 25%<br>D: 6.5%<br>SD: 0.5%                                                                                                                                                                             | SA: 58.7%<br>A: 37.5%<br>D: 3.3%<br>SD: 0.5%                                                                                                   | SA: 56%<br>A: 35.9%<br>D: 8.1%<br>SD: 0%                                                                                                                     | SA: 47.8%<br>A: 39.7%<br>D: 11.4%<br>SD: 1.1%                                                                                                                                                                                                                                                                                                |                                            |
| <b>Molecules<br/>(Smaller and faster)</b>                                                                                            |                                                                                                                                                                                                                                                                                                                        |                                                                                                                                                                                                                        | ▶                                                                                                                                              | <b>Ecosystems<br/>(Larger and slower)</b>                                                                                                                    |                                                                                                                                                                                                                                                                                                                                              |                                            |
| <b>Biological Scale</b>                                                                                                              |                                                                                                                                                                                                                                                                                                                        |                                                                                                                                                                                                                        |                                                                                                                                                |                                                                                                                                                              |                                                                                                                                                                                                                                                                                                                                              |                                            |

**Supplemental Table 1. Additional Concepts for the BioCore Guide.** National validation respondent suggestions for additional important concepts for graduating biology majors to know that are not currently included in the BioCore Guide. If multiple reviewers suggested a concept, the number of reviewer is shown in parentheses. We have organized them into the categories of the core concepts of Vision and Change when possible.

|                  |                                                                                                                                                                                                                                                                                                                                                                                                                                                                                                                                                                                                                                                                                                                                                                                                                                                                                                                                                                                                                |
|------------------|----------------------------------------------------------------------------------------------------------------------------------------------------------------------------------------------------------------------------------------------------------------------------------------------------------------------------------------------------------------------------------------------------------------------------------------------------------------------------------------------------------------------------------------------------------------------------------------------------------------------------------------------------------------------------------------------------------------------------------------------------------------------------------------------------------------------------------------------------------------------------------------------------------------------------------------------------------------------------------------------------------------|
| Evolution        | <p>Life has three domains of diversity: Bacteria, Archaea, and Eucarya; each of which has unique characteristics and differences and has descended from a common ancestor (5)</p> <p>Commonality of developmental mechanisms used by a wide variety of disparate organisms (3)</p> <p>Communication between individuals; behavior is an important adaptation (3)</p> <p>History of life and patterns of extinction (2)</p> <p>Common ancestry – understanding that all life is related (2)</p> <p>Evolution of sex and sex differences</p> <p>How Darwin formulated the theory of evolution</p> <p>Timing of evolution</p> <p>Differentiate acclimation and adaptation</p> <p>Evolution of molecules</p> <p>Understanding that many of the cell and molecular mechanisms/processes in humans originated in prokaryotes</p> <p>Role of species interactions in structuring communities and shaping evolutionary patterns</p> <p>Natural history of plants and animals where they live</p> <p>Macroevolution</p> |
| Information Flow | <p>Osmosis/equilibrium/diffusion (2)</p> <p>Different steps of gene regulation</p> <p>The importance of randomness in biological systems, interactions, mutations, etc.</p> <p>Feedback loops (including both positive and negative feedback)</p>                                                                                                                                                                                                                                                                                                                                                                                                                                                                                                                                                                                                                                                                                                                                                              |

|                                      |                                                                                                                                                                                                                                                                                                                                                                                                                                                                                                                                                                                                             |
|--------------------------------------|-------------------------------------------------------------------------------------------------------------------------------------------------------------------------------------------------------------------------------------------------------------------------------------------------------------------------------------------------------------------------------------------------------------------------------------------------------------------------------------------------------------------------------------------------------------------------------------------------------------|
|                                      | <p>Biological plasticity (behavioral, developmental, and genetic)</p> <p>Genetic code is approximately universal</p>                                                                                                                                                                                                                                                                                                                                                                                                                                                                                        |
| Structure Function                   | <p>Immune system, including innate and adaptive (2)</p> <p>Other non-organelle cell structures (cell membranes, ribosomes, etc.) (2)</p> <p>Influence of structure and behavior of water on molecular/cellular functions</p> <p>Stem cells – what they are, how they are created, and their roles</p> <p>Organisms provide environment that houses other organisms and pathogens</p> <p>Biomes is a critical concept relating to the ecological level of structure</p> <p>Ecological structure changing over times relates to disturbance and succession</p> <p>Conformational change in macromolecules</p> |
| Transformations of Energy and Matter | <p>Definition of life – living cells that are taking in energy and giving off waste (2)</p> <p>Energy sources on Earth and spectral distribution of energy that reaches the Earth from the sun</p> <p>Light capture is mechanism by which energy is transformed</p> <p>Biogeochemical cycling and decomposition are important for understanding ecosystems</p> <p>Importance of Carbon and Oxygen for life</p>                                                                                                                                                                                              |
| Systems                              | <p>Metagenomics</p> <p>Community structure</p> <p>Emergent properties</p> <p>Life is so diverse because of myriad interactions among species</p>                                                                                                                                                                                                                                                                                                                                                                                                                                                            |
| Other                                | <p>Competencies (11)</p> <p>Parasitism</p> <p>Cancer</p> <p>Climate change</p> <p>Disease/infection</p>                                                                                                                                                                                                                                                                                                                                                                                                                                                                                                     |
